# Supplementary material for: Synthesis and hydrogen release properties of alkyl-substituted amine-boranes
Source: Royal Society of Chemistry journal article supplement (doi:10.1039/c4ta01631a), 2014-01-01
Supplement: c4ta01631a1.pdf [file c4ta01631a1.pdf]

## Synthesis and Hydrogen Release Properties of Alkyl-substituted Amine-boranes

Lijun Zhang,<sup>a</sup> Shaofeng Li,<sup>a</sup> Yingbin Tan,<sup>a</sup> Ziwei Tang,<sup>a</sup> Zaiping Guo<sup>b</sup> and Xuebin Yu<sup>\*a</sup>

<sup>a</sup>*Department of Materials Science, Fudan University, Shanghai 200433, China;*

<sup>b</sup>*Institute for Superconducting and Electronic Materials University of Wollongong Wollongong, NSW 2522, Australia*

\* To whom correspondence should be addressed:

Phone and Fax: +86-21-5566 4581. *E-mail:* [yuxuebin@fudan.edu.cn](mailto:yuxuebin@fudan.edu.cn) (XB Yu)

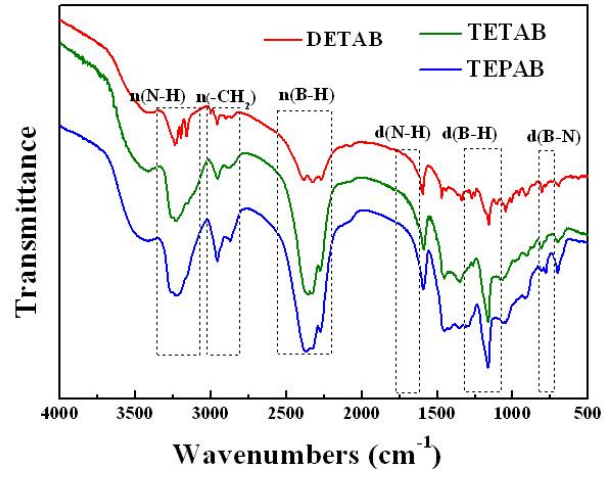

Fig. S1. FT-IR spectra of DETAB, TETAB and TEPAB.

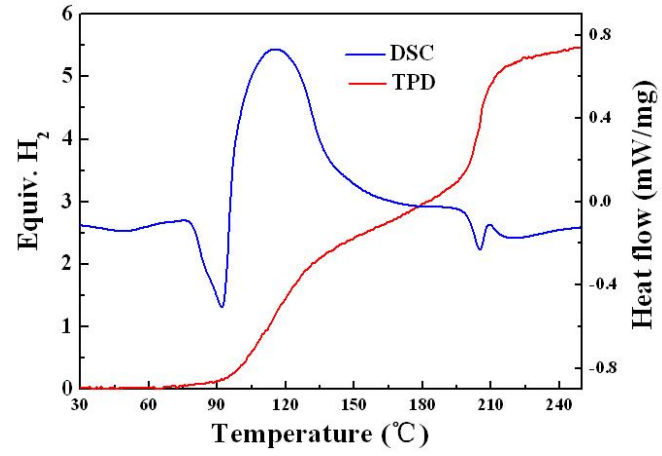

Fig. S2. DSC and TPD results for DETAB with a heating rate of  $5^{\circ}\text{C min}^{-1}$  in nitrogen.
